# Supplementary material for: A Toll-like receptor identified in Gigantidas platifrons and its potential role in the immune recognition of endosymbiotic methane oxidation bacteria
Source: PeerJ. 2021 Apr 30;9:e11282. doi: 10.7717/peerj.11282 (PMC8092104; doi:10.7717/peerj.11282)
Supplement: Supplemental Information 2 [file peerj-09-11282-s002.xlsx]

## Sheet: raw data_qRT-PCR
Groups	Reference_gene	Ct_1	Ct_2	Ct_3	Ct_average	Target_gene	Ct_1	Ct_2	Ct_3	Ct_average
In situ	actin	27.19	26.71	25.17	26.3567	TLR13	31.12	30.21	29.7	30.3433
Antibiotics 0d	actin	26.8	26.47	25.32	26.1967	TLR13	34.28	33.44	33.72	33.8133
Antibiotics 7d	actin	25.86	26.67	27.49	26.6733	TLR13	31.71	32	32.84	32.1833
Antibiotics 14d	actin	25.99	27.9	27.36	27.0833	TLR13	34.18	35.59	34.29	34.6867
Antibiotics 21d	actin	26.41	26.56	24.83	25.9333	TLR13	31.21	32.72	31.18	31.7033
Antibiotics 28d	actin	25.4	26.23	26.7	26.11	TLR13	32.88	33.21	34.67	33.5867
